# Supplementary material for: Widespread mitovirus sequences in plant genomes
Source: PeerJ. 2015 Apr 9;3:e876. doi: 10.7717/peerj.876 (PMC4393810; doi:10.7717/peerj.876)
Supplement: Table S1 — A list of the plant mitochondrial genomes with complete sequences analyzed for narnavirus sequences. There are 40 sequences with narnavirus NERVEs and 50 without. [file peerj-03-876-s003.xls]

## Sheet: Sheet1
Organism	mitochondrial DNA accession	narnavirus NIRV in mitochondrion	Division	Order
Aegilops speltoides	NC_022666	no	Streptophyta	Poales
Anomodon attenuatus	NC_021931	no	Streptophyta	Hypnales
Anomodon rugelii	NC_016121	no	Streptophyta	Hypnales
Chaetosphaeridium globosum	NC_004118	no	Streptophyta	Coleochaetales
Chara vulgaris	NC_005255	no	Streptophyta	Charales
Chlamydomonas eugametos	NC_001872	no	Chlorophyta	Chlamdommonadales
Chlamydomonas reinhardtii	NC_001638	no	Chlorophyta	Chlamdommonadales
Chlorokybus atmophyticus	NC_009630	no	Streptophyta	Chlorokybales
Closterium baillyanum	NC_022860	no	Streptophyta	Desmidiales
Cucurbita pepo	NC_014050	no	Streptophyta	Cucurbitales
Dunaliella salina	NC_012930	no	Chlorophyta	Volvocales
Gonium pectorale	NC_020437	no	Chlorophyta	Volvocales
Helicosporidium	NC_017841	no	Chlorophyta	unclassified
Marchantia polymorpha	NC_001660	no	Streptophyta	Marchantiales
Megaceros aenigmaticus	NC_012651	no	Streptophyta	Dendrocerotales
Mesotigma viride	NC_008240	no	Streptophyta	Mesostigmatales
Micromonas	NC_012643	no	Chlorophyta	Mamiellales
Monomastix	NC_022797	no	Chlorophyta	Prasinophyceae incertae sedis
Nephroselmis olivacea	NC_008239	no	Chlorophyta	Pserudoscourfieldiales
Nitella hyalina	NC_017598	no	Streptophyta	Charales
Oltmannsiellopsis viridis	NC_008256	no	Chlorophyta	Chlorophyta incertae sedis
Oryza rufipogon	NC_013816	no	Streptophyta	Poales
Oryza sativa Indica	NC_007866	no	Streptophyta	Poales
Oryza sativa Japonica	NC_011033	no	Streptophyta	Poales
Ostreococcus tauri	NC_008290	no	Chlorophyta	Mamiellales
Pedinomonas minor	NC_000892	no	Chlorophyta	Pedinomonadales
Phaeoceros laevis	NC_013765	no	Streptophyta	Notothyladales
Physcomitrella patrens	NC_007945	no	Streptophyta	Funariales
Pleodorins starrii	NC_021108	no	Chlorophyta	Chlamdomonadales
Pleurozia purpurea	NC_013444	no	Streptophyta	Pleuroziales
Polytomella capuana	NC_010357	no	Chlorophyta	Chlamdomonadales
Polytomella magna	NC_023091	no	Chlorophyta	Chlamdomonadales
Polytomella parva	NC_016916	no	Chlorophyta	Chlamdomonadales
Polytomella parva	NC_016917	no	Chlorophyta	Chlamdomonadales
Prasinoderma coloniale	NC_023355	no	Chlorophyta	Pseudoscourfieldiales
Prototheca wickerhamii	NC_001613	no	Chlorophyta	Chlorellales
Pseudendoclonium akinetum	NC_005926	no	Chlorophyta	Ulvales
Pycnococcus provasolii	NC_013935	no	Chlorophyta	Pseudoscourfieldiales
Roya obtusa	NC_022863	no	Streptophyta	Zygnematales
Scenedesmus obliquus	NC_002254	no	Chlorophyta	Spheropleales
Sorghum bicolor	NC_008360	no	Streptophyta	Poales
Trebouxiophyceae	NC_018568	no	Chlorophyta	unclassified
Treubia lacunosa	NC_016122	no	Streptophyta	Treubiales
Tripsacum dactyloides	NC_008362	no	Streptophyta	Poales
Triticum aestivum	NC_007579	no	Streptophyta	Poales
Triticum timopheevii	NC_022714	no	Streptophyta	Poales
Vigna angularis	NC_021092	no	Streptophyta	Fabales
Zea luxurians	NC_008333	no	Streptophyta	Poales
Zea mays	NC_007982	no	Streptophyta	Poales
Zea perennis	NC_008331	no	Streptophyta	Poales
Ajuga reptans	NC_023103	yes	Streptophyta	Lamiales
Amborella trichopoda	gb|KF754803.1|	yes	Streptophyta	Amborellales
Arabidopsis thaliana	NC_001284	yes	Streptophyta	Brassicales
Asclepias syriaca	NC_022796	yes	Streptophyta	Gentianales
Beta macrocarpa	emb|FQ378026.1|	yes	Streptophyta	Caryophyllales
Beta vulgaris	dbj|BA000024.1|	yes	Streptophyta	Caryophyllales
Boea hygrometrica	NC_016741	yes	Streptophyta	Lamiales
Brassica carinata	NC_016120	yes	Streptophyta	Brassicales
Brassica juncea	NC_016123	yes	Streptophyta	Brassicales
Brassica nupus	NC_008285	yes	Streptophyta	Brassicales
Brassica oleracea	NC_016125	yes	Streptophyta	Brassicales
Butomus uymbellatus	NC_021399	yes	Streptophyta	Alismatales
Carica papaya	NC_012116	yes	Streptophyta	Brassicales
Citrullus lanatus	gb|GQ856147.1|	yes	Streptophyta	Cucurbitales
Cucumis sativus	NC_016005	yes	Streptophyta	Cucurbitales
Cucurbita pepo	gb|GQ856148.1|	yes	Streptophyta	Cucurbitales
Cycas taitungensis	NC_010303	yes	Streptophyta	Cycadales
Daucus carota	NC_017855	yes	Streptophyta	Apiales
Glycine max	NC_020455	yes	Streptophyta	Fabales
Helianthus annuus	NC_023337	yes	Streptophyta	Asterales
Huperzia squarrosa	NC_017755	yes	Streptophyta	Lycopodiales
Liriodendron tulipifera	NC_021152	yes	Streptophyta	Magnoliales
Lotus japnicus	NC_016743	yes	Streptophyta	Fabales
Malus x domestica	NC_018554	yes	Streptophyta	Rosales
Millettia pinnata	NC_016742	yes	Streptophyta	Fabales
Mimulus guyttatus	NC_018041	yes	Streptophyta	Lamiales
Nicotiana tabacum	NC_006581	yes	Streptophyta	Solanales
Phoenix dactylifera	NC_016740	yes	Streptophyta	Arecales
Raphanus sativus	NC_018551	yes	Streptophyta	Brassicales
Ricinus communis	NC_015141	yes	Streptophyta	Malpighiales
Salvia miltiorrhiza	NC_023209	yes	Streptophyta	Lamiales
Silene conica	gb|JF750556.1|	yes	Streptophyta	Caryophyllales
Silene noctiflora	gb|JF750466.1|	yes	Streptophyta	Caryophyllales
Silene vulgaris	gb|JQ771311.1|	yes	Streptophyta	Caryophyllales
Silene vulgaris	gb|JQ771306.1|	yes	Streptophyta	Caryophyllales
Spirodela polyrhiza	NC_017840	yes	Streptophyta	Alismatales
Vaccinium macrocarpon	NC_023338	yes	Streptophyta	Ericales
Vicia faba	gb|KC189947.1|	yes	Streptophyta	Fabales
Vigna radiata	NC_015121	yes	Streptophyta	Fabales
Vitis vinifera	NC_012119	yes	Streptophyta	Vitales
